# Supplementary material for: Mammographic density as an image-based biomarker of therapy response in neoadjuvant-treated breast cancer patients
Source: PubMed Central journal article supplement (PMC7870759; doi:10.1007/s10552-020-01379-w), 2020-12-30
Supplement: 10552_2020_1379_MOESM1_ESM.pdf [file 10552_2020_1379_MOESM1_ESM.pdf]

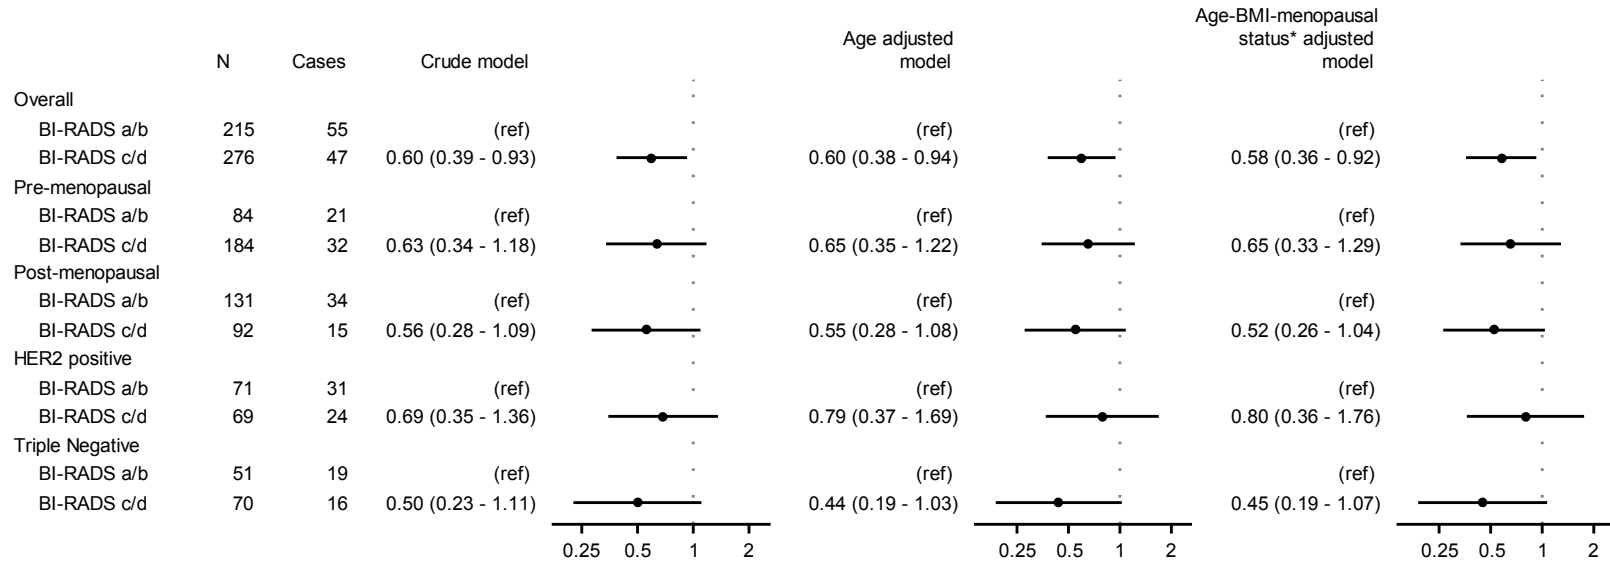

\*Applicable to: "Overall", "HER2 positive", and "Triple negative"
